# Supplementary material
Source: Springer Nature journal article supplement (https://www.springermedizin.de/resource/supplementary/12961_2011_214_MOESM2_ESM.pdf/9571676)

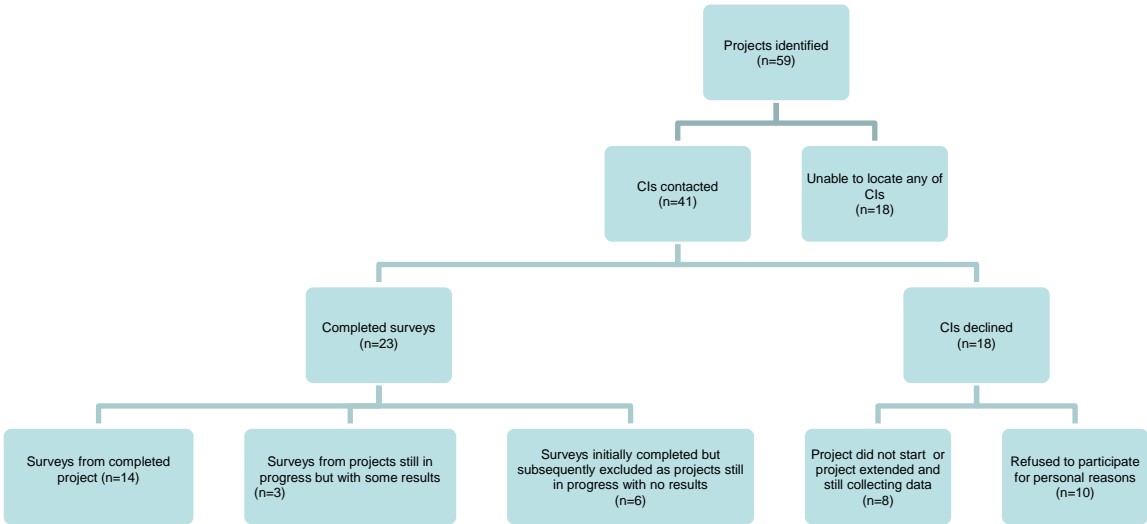

Supplement: MOESM2 [file 9571676]
